# Supplementary material
Source: PubMed Central journal article supplement (PMC6558289)

560 **Figure S1. Haematoxylin and eosin stainings of tumor organoids and original mismatch repair**  
561 **deficient colorectal cancers**, related to Figure 1.

562 Excised tumor pieces or tumor organoids derived thereof were fixed, paraffin-embedded and stained with  
563 haematoxylin and eosin. Inserts show higher magnification images of boxed area. Scale bar = 50  $\mu$ m.

564

565 **Figure S2. MHC-I expression of mismatch repair deficient colorectal cancer organoids and original**  
566 **tumors**, related to Figure 1.

567 (A) Cell surface MHC-I expression of mismatch repair deficient colorectal cancer organoids as  
568 determined by flow cytometry. Organoids were stimulated with 200 ng/mL IFN $\gamma$  for 24 hours or left  
569 unstimulated. Histograms indicate fluorescence intensity of anti-HLA-A,B,C-PE or isotype control  
570 antibodies.

571 (B) Excised tumor pieces were fixed and paraffin-embedded, and sequential slides were stained with  
572 HCA2 and HC10 antibodies against MHC-I. Representative staining of MHC-I proficient (CRC-6M) and  
573 deficient (CRC-4) tumors. CRC-4 shows positive MHC-I staining in stroma but absence of signal in the  
574 tumor mass. CRC-6M contains MHC-I positive tumor cells grouped in islands. Scale bar = 100  $\mu$ m.

575

576 **Figure S3. Haematoxylin and eosin stainings of tumor organoids and original non-small cell lung**  
577 **cancers**, related to Figure 3.

578 Excised tumor pieces or tumor organoids derived thereof were fixed, paraffin-embedded and stained with  
579 haematoxylin and eosin. Inserts show higher magnification images of boxed area. Scale bar = 50  $\mu$ m.

580

581 **Figure S4. CD4<sup>+</sup> reactivity against Geltrex**, related to Figure 5.

582

583 Quantification of CD137<sup>+</sup> CD4<sup>+</sup> T cells after stimulation of T cells with organoids cultured under  
584 standard conditions (with Geltrex), cultured for 3 days without Geltrex, or cultured for 3 days without  
585 Geltrex with Geltrex re-introduced 1 day before T cell challenge. T cells were obtained by two week co-  
586 culture with autologous tumor organoids and where indicated (lower case e) further expanded using a  
587 rapid expansion protocol (Dudley et al. 2013), in some cases preceded by CD137-based enrichment of  
588 tumor-reactive cells (indicated by upper case E). Error bars indicate s.e.m. of at least 2 biological  
589 replicates.

590 **Figure S5. Time course imaging of NSCLC-3 organoids targeted by tumor-reactive T cells**, related  
591 to Figure 6.

592 Microphotograph images of NSCLC-3 organoids at indicated time points of culture with or without T  
593 cells in the presence of a green-fluorescent caspase 3/7 probe. Where indicated, MHC-I and MHC-II were  
594 blocked with W6/32 and Tü39 antibodies, respectively. T cells are obtained by two weeks of co-culture  
595 with autologous tumor organoids followed by rapid expansion (indicated by upper case e).

596

597

# Figure S1

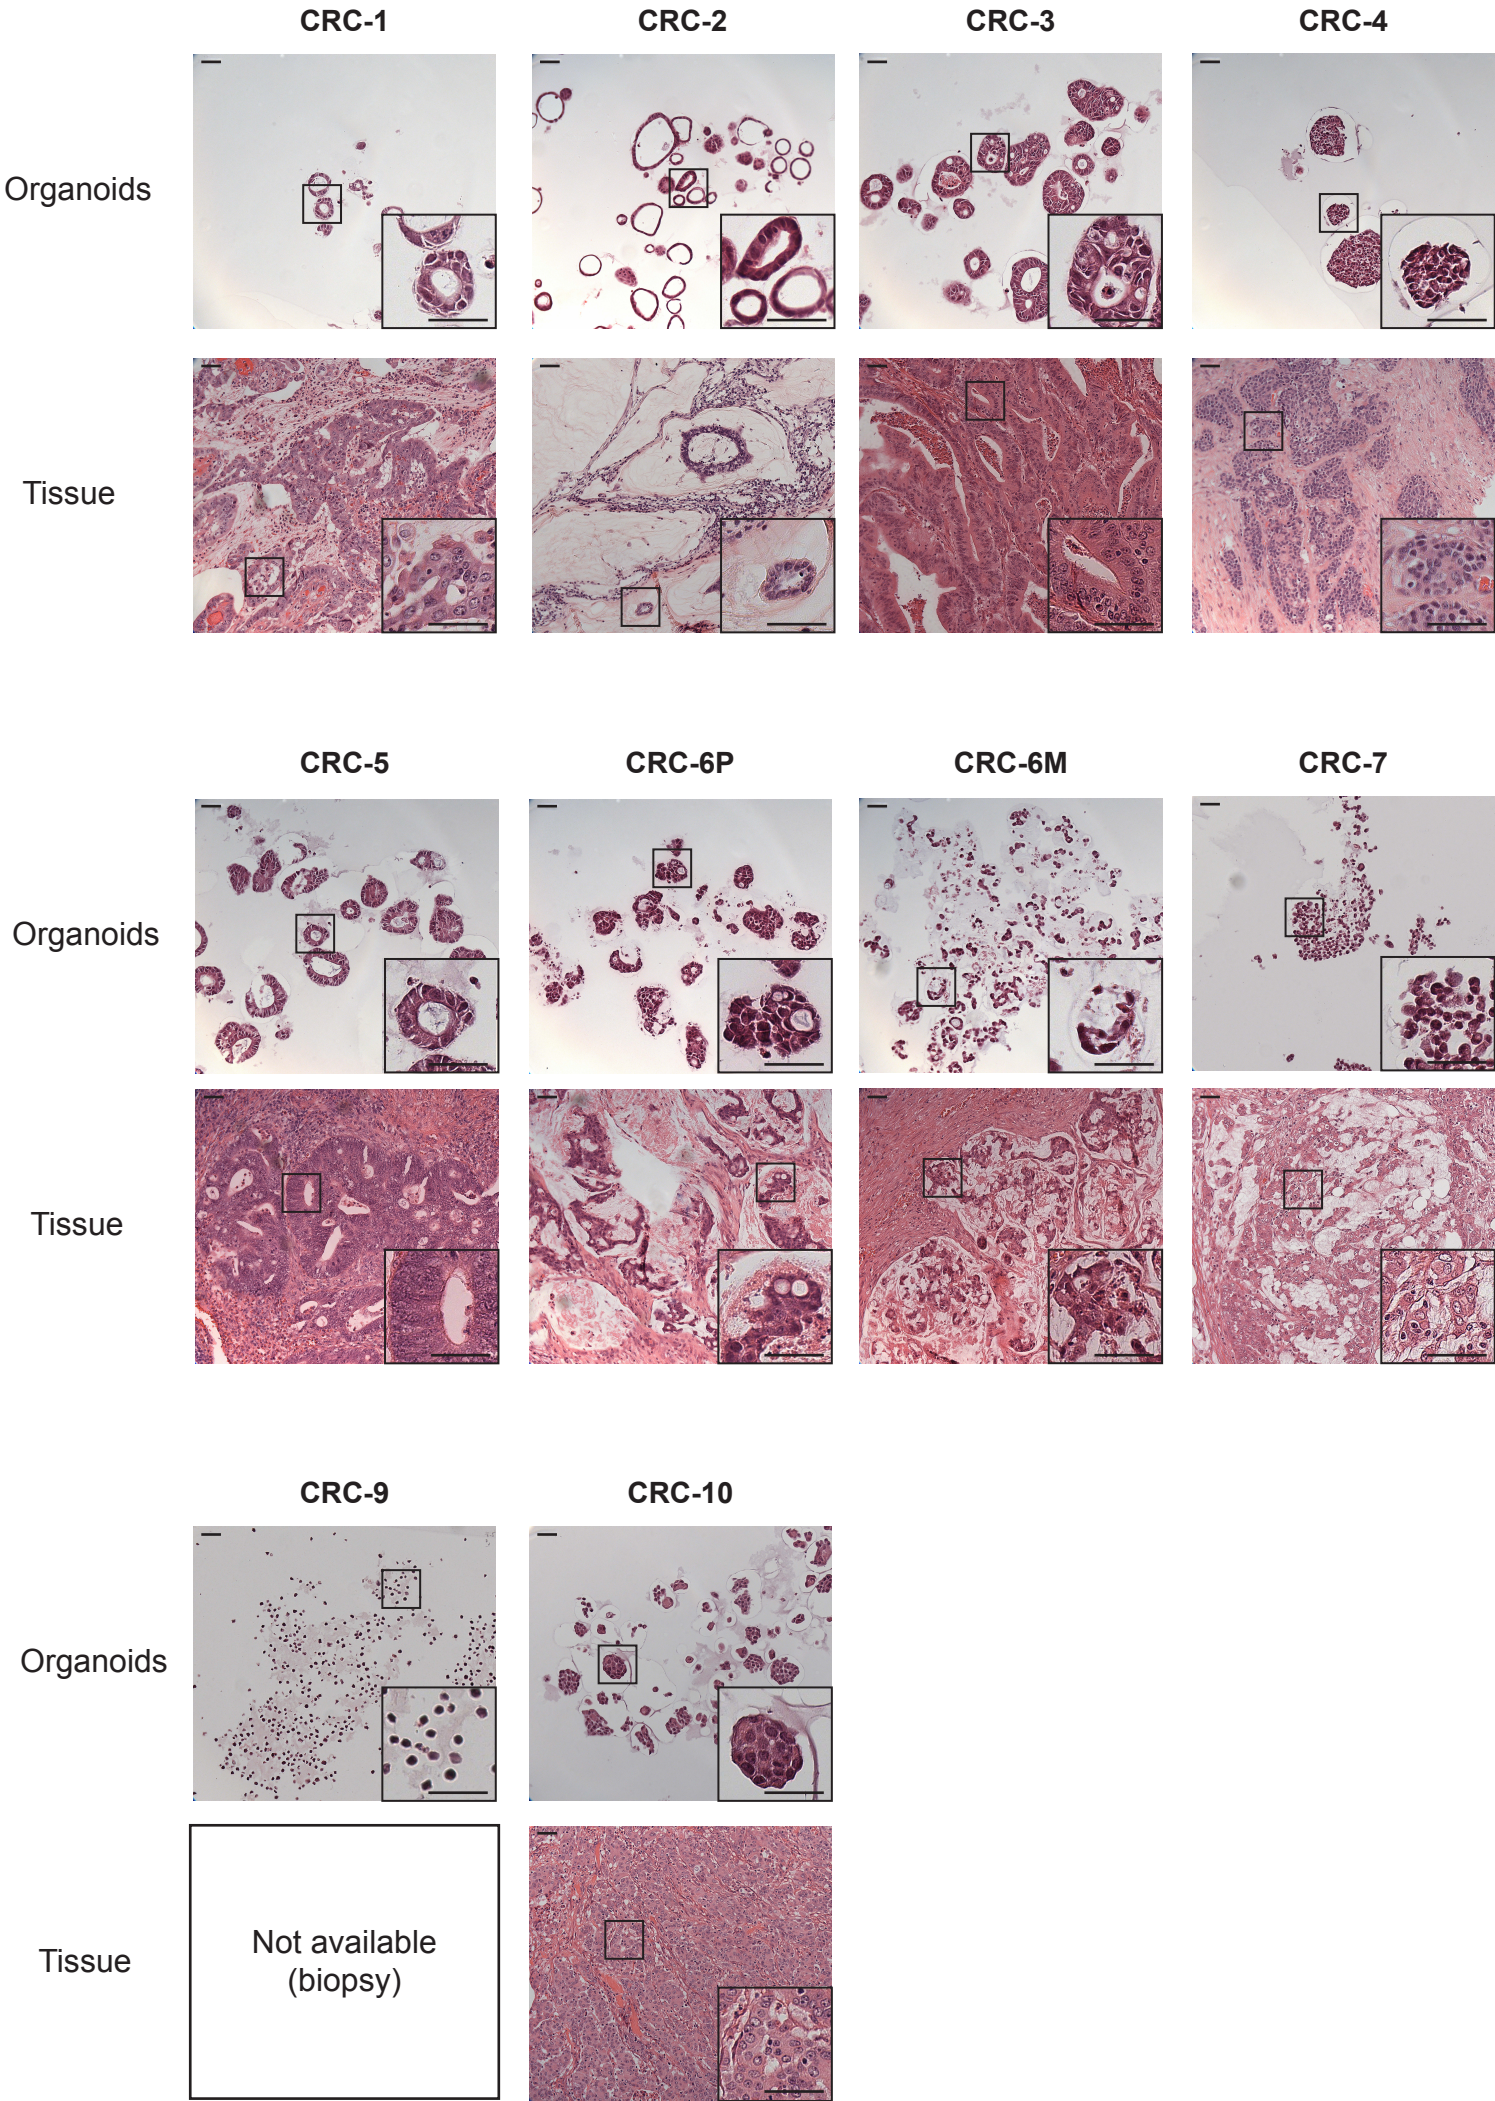

# Figure S2

A

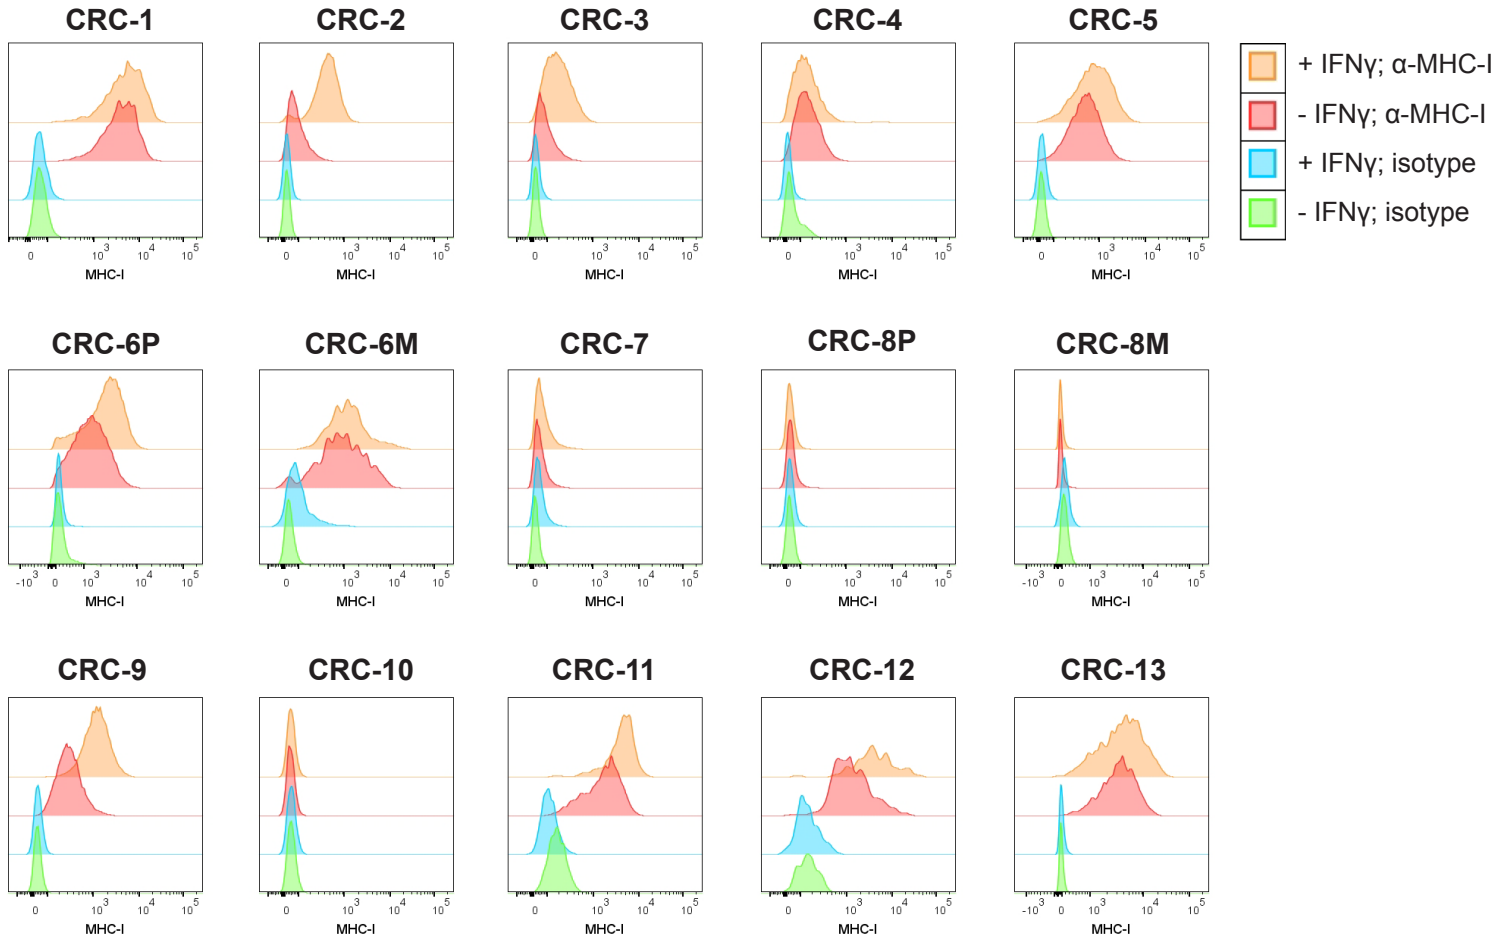

B

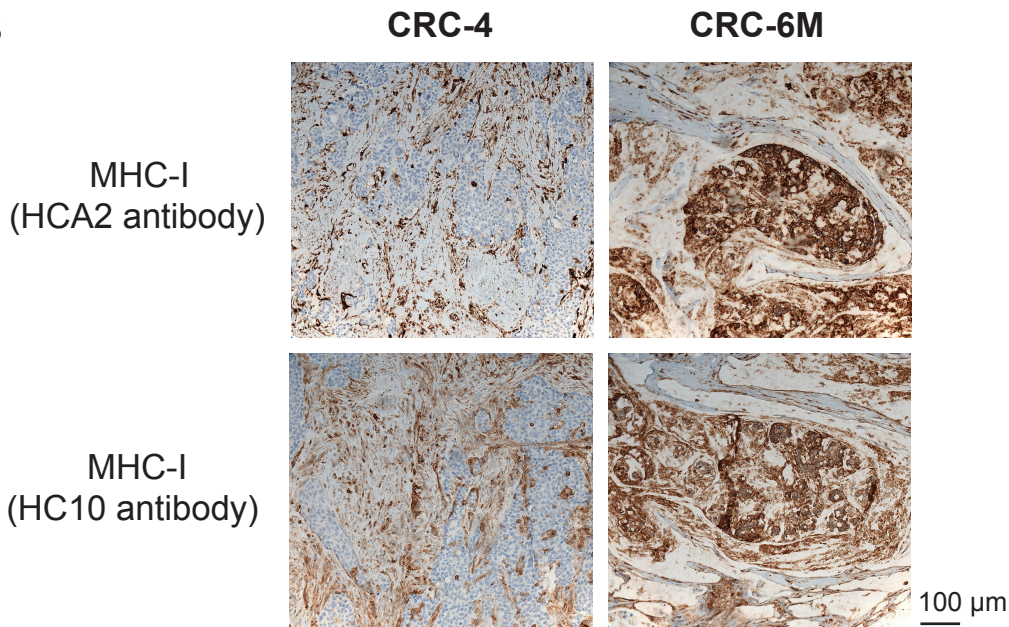

**Figure S3**

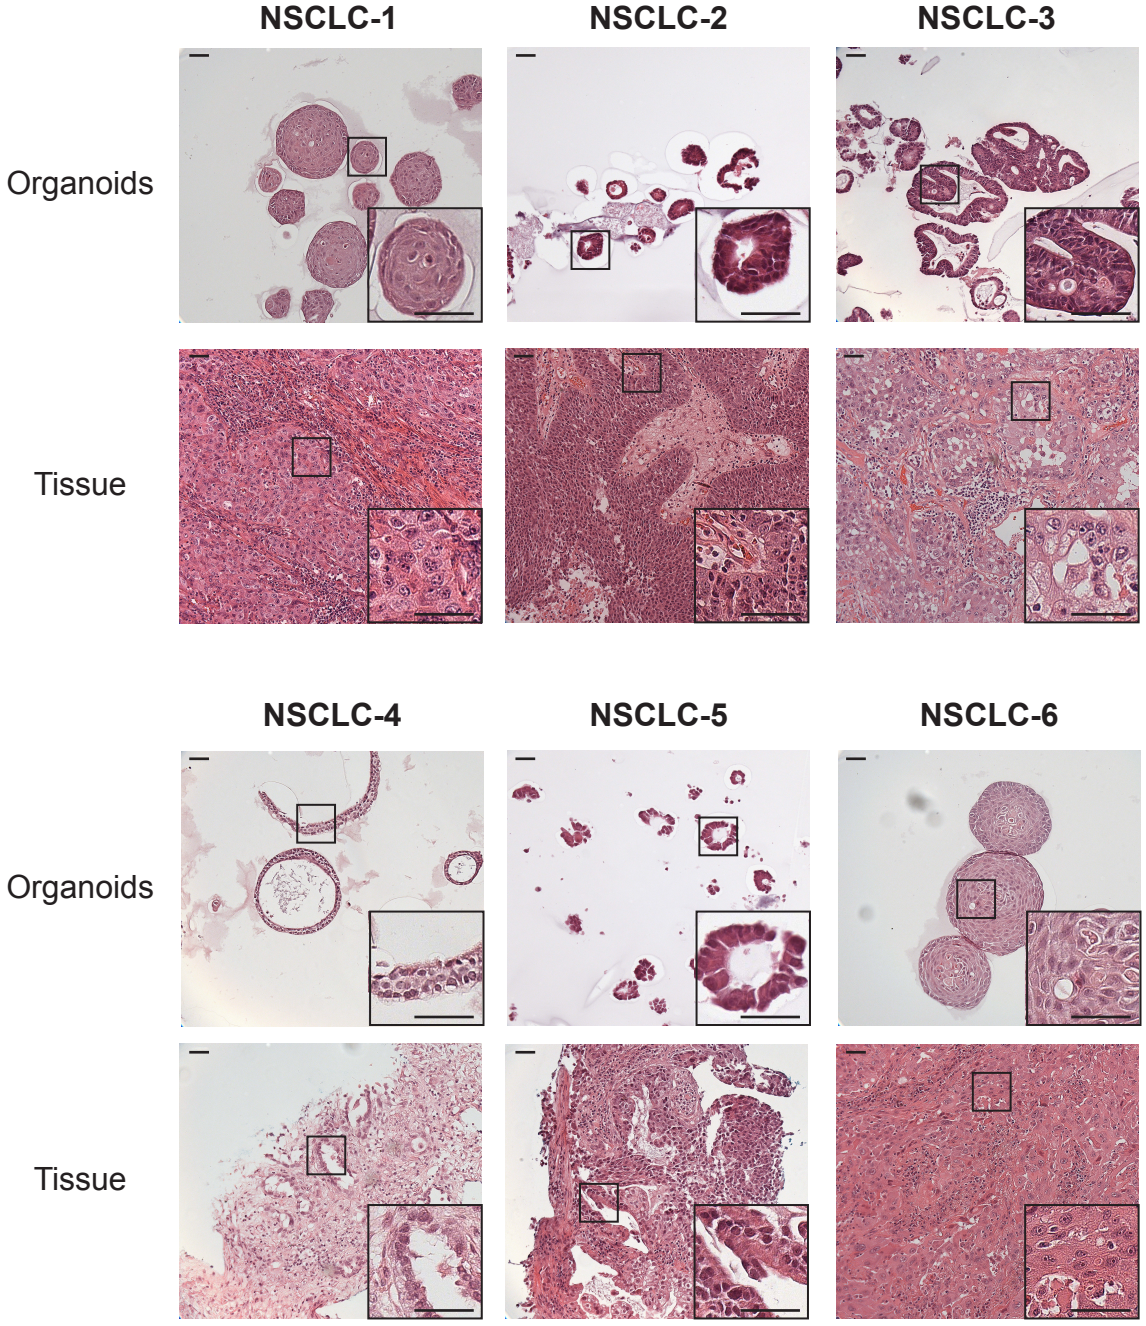

Figure S4

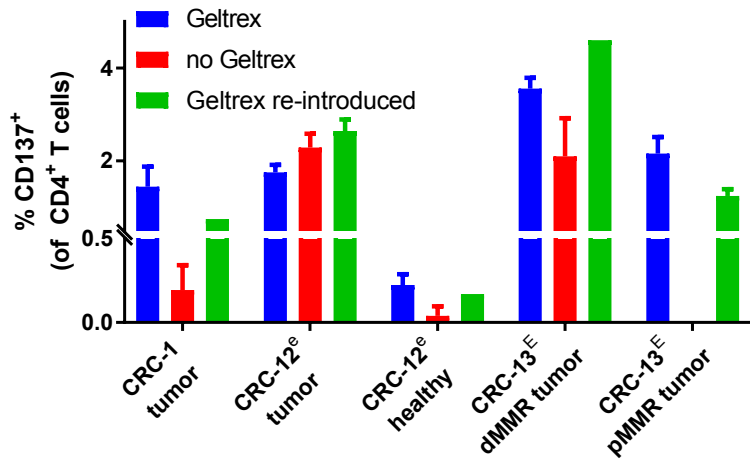

# Figure S5

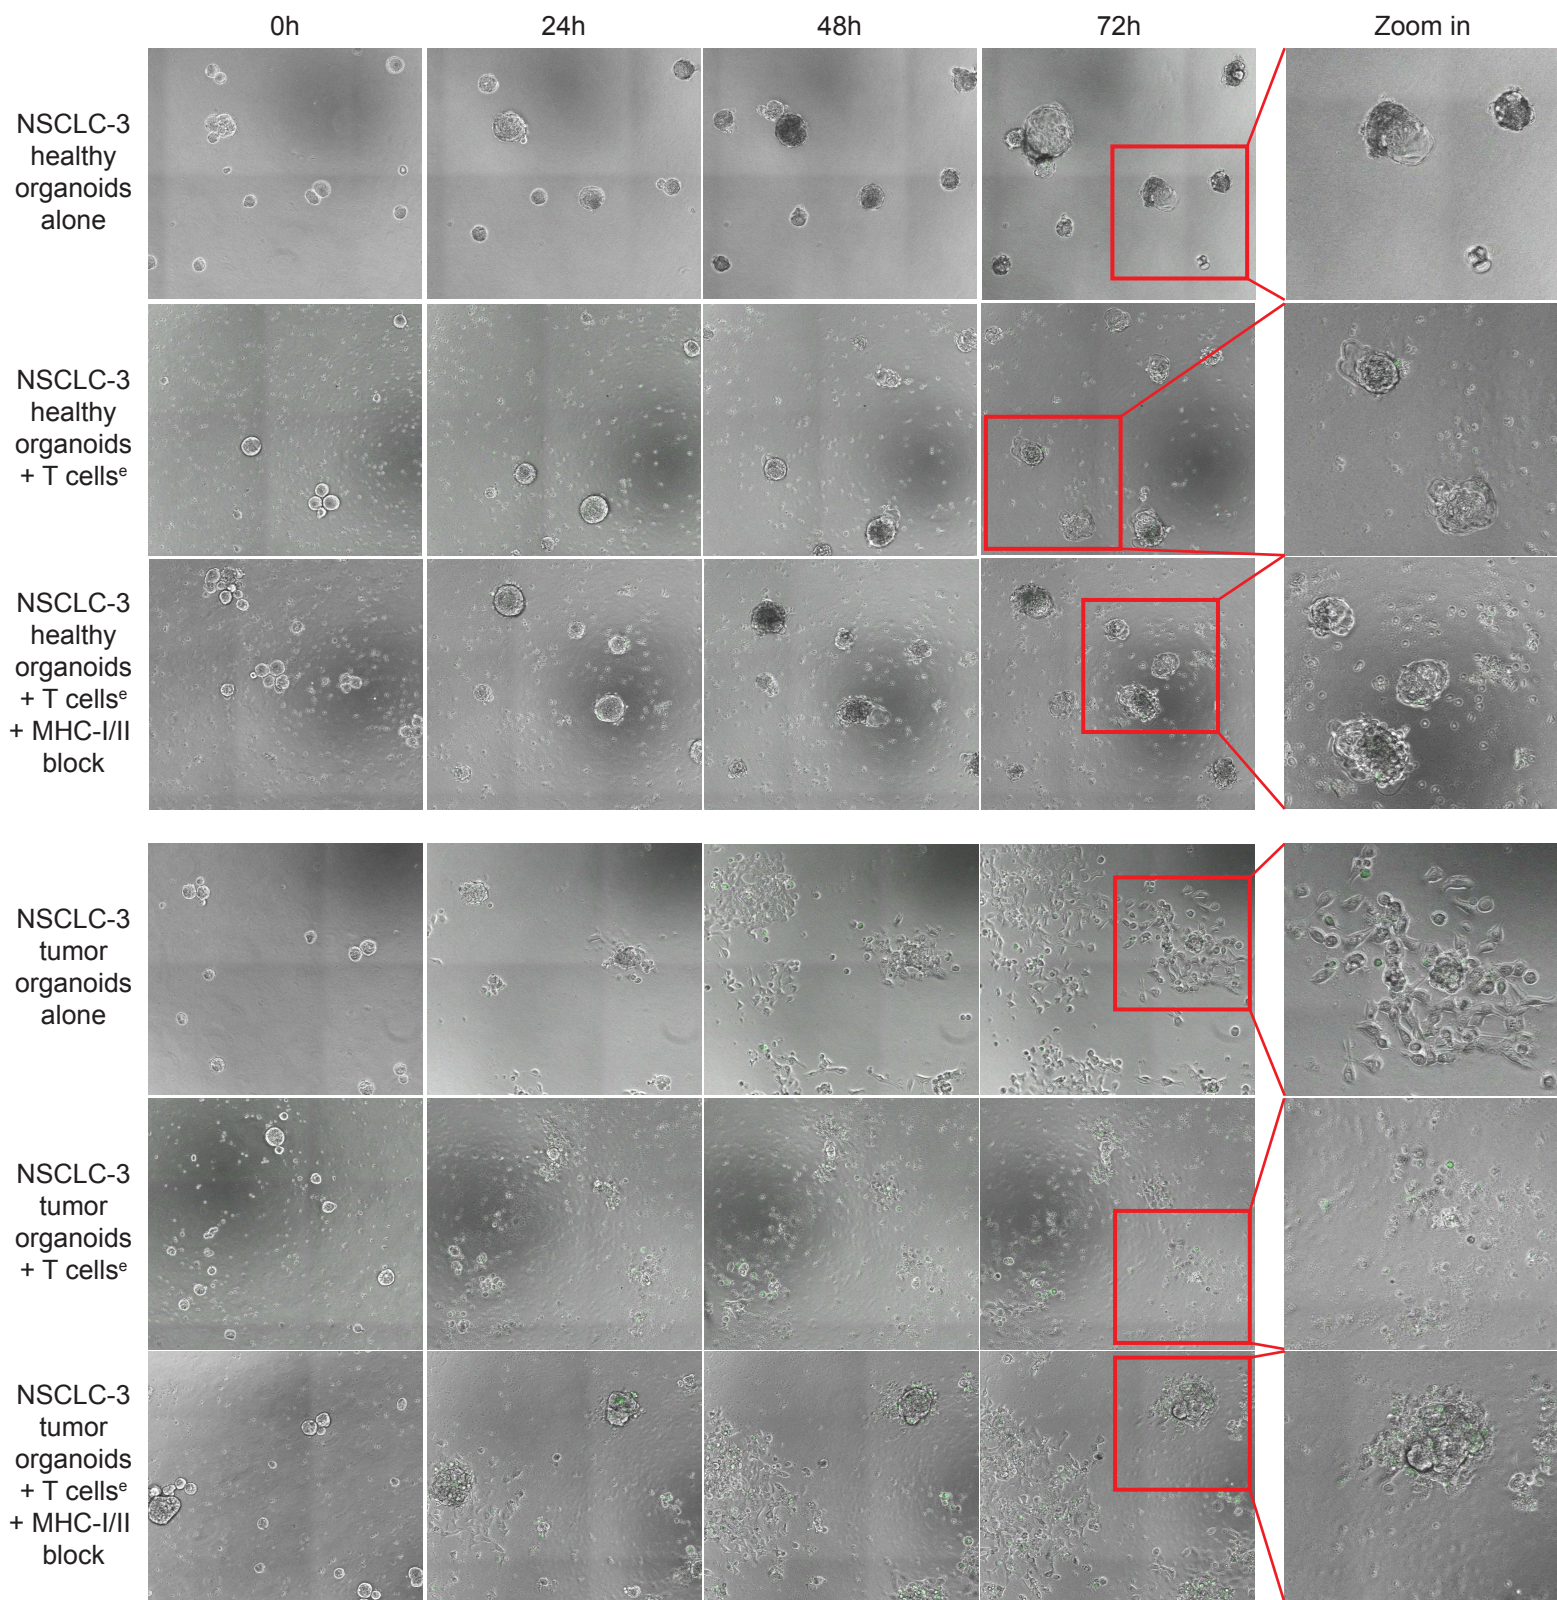

Supplement: EMS83290-supplement-Suppl_Figs_and_Legends.pdf [file EMS83290-supplement-Suppl_Figs_and_Legends.pdf]
